# Supplementary material for: Membrane rolling induced by bacterial toxins
Source: Royal Society of Chemistry journal article supplement (doi:10.1039/c9sm01913h), 2020-01-01
Supplement: c9sm01913h3.log [file c9sm01913h3.log]

This is pdfTeX, Version 3.14159265-2.6-1.40.20 (MiKTeX 2.9.7250 64-bit) (preloaded format=pdflatex 2019.12.9)  16 DEC 2019 10:46
entering extended mode
**./Article_Revised_Diff.tex
(Article_Revised_Diff.tex
LaTeX2e <2019-10-01> patch level 3
("C:\Program Files\MiKTeX 2.9\tex/latex/base\article.cls"
Document Class: article 2019/10/25 v1.4k Standard LaTeX document class
("C:\Program Files\MiKTeX 2.9\tex/latex/base\size10.clo"
File: size10.clo 2019/10/25 v1.4k Standard LaTeX file (size option)
)
\c@part=\count80
\c@section=\count81
\c@subsection=\count82
\c@subsubsection=\count83
\c@paragraph=\count84
\c@subparagraph=\count85
\c@figure=\count86
\c@table=\count87
\abovecaptionskip=\skip41
\belowcaptionskip=\skip42
\bibindent=\dimen102
)
(C:\Users\klenow\AppData\Roaming\MiKTeX\2.9\tex/latex/extsizes\extsizes.sty
Package: extsizes 1996/10/08 v1.0 Non Standard LaTeX Package


Package ExtSizes Warning: It is better to use one of the extsizes classes,
 if you can.

(C:\Users\klenow\AppData\Roaming\MiKTeX\2.9\tex/latex/extsizes\size9.clo
File: size9.clo 1999/11/11 v1.4a NON-Standard LaTeX file (size option)
))
(C:\Users\klenow\AppData\Roaming\MiKTeX\2.9\tex/latex/natbib\natbib.sty
Package: natbib 2010/09/13 8.31b (PWD, AO)
\bibhang=\skip43
\bibsep=\skip44
LaTeX Info: Redefining \cite on input line 694.
\c@NAT@ctr=\count88
)
(C:\Users\klenow\AppData\Roaming\MiKTeX\2.9\tex/latex/mhchem\mhchem.sty
Package: mhchem 2018/06/22 v4.08 for typesetting chemical formulae

("C:\Program Files\MiKTeX 2.9\tex/latex/l3kernel\expl3.sty"
Package: expl3 2019-11-07 L3 programming layer (loader) 

("C:\Program Files\MiKTeX 2.9\tex/latex/l3kernel\expl3-code.tex"
Package: expl3 2019-11-07 L3 programming layer (code)
\c_max_int=\count89
\l_tmpa_int=\count90
\l_tmpb_int=\count91
\g_tmpa_int=\count92
\g_tmpb_int=\count93
\l__seq_internal_a_int=\count94
\l__seq_internal_b_int=\count95
\g__kernel_prg_map_int=\count96
\c__ior_term_noprompt_ior=\count97
\c_log_iow=\count98
\l_iow_line_count_int=\count99
\l__iow_line_target_int=\count100
\l__iow_one_indent_int=\count101
\l__iow_indent_int=\count102
\c_zero_dim=\dimen103
\c_max_dim=\dimen104
\l_tmpa_dim=\dimen105
\l_tmpb_dim=\dimen106
\g_tmpa_dim=\dimen107
\g_tmpb_dim=\dimen108
\c_zero_skip=\skip45
\c_max_skip=\skip46
\l_tmpa_skip=\skip47
\l_tmpb_skip=\skip48
\g_tmpa_skip=\skip49
\g_tmpb_skip=\skip50
\c_zero_muskip=\muskip10
\c_max_muskip=\muskip11
\l_tmpa_muskip=\muskip12
\l_tmpb_muskip=\muskip13
\g_tmpa_muskip=\muskip14
\g_tmpb_muskip=\muskip15
\l_keys_choice_int=\count103
\l__intarray_loop_int=\count104
\c__intarray_sp_dim=\dimen109
\g__intarray_font_int=\count105
\c__fp_leading_shift_int=\count106
\c__fp_middle_shift_int=\count107
\c__fp_trailing_shift_int=\count108
\c__fp_big_leading_shift_int=\count109
\c__fp_big_middle_shift_int=\count110
\c__fp_big_trailing_shift_int=\count111
\c__fp_Bigg_leading_shift_int=\count112
\c__fp_Bigg_middle_shift_int=\count113
\c__fp_Bigg_trailing_shift_int=\count114
\c__kernel_randint_max_int=\count115
\g__fp_array_int=\count116
\l__fp_array_loop_int=\count117
\l__sort_length_int=\count118
\l__sort_min_int=\count119
\l__sort_top_int=\count120
\l__sort_max_int=\count121
\l__sort_true_max_int=\count122
\l__sort_block_int=\count123
\l__sort_begin_int=\count124
\l__sort_end_int=\count125
\l__sort_A_int=\count126
\l__sort_B_int=\count127
\l__sort_C_int=\count128
\l__str_internal_int=\count129
\c__str_replacement_char_int=\count130
\l__tl_analysis_normal_int=\count131
\l__tl_analysis_index_int=\count132
\l__tl_analysis_nesting_int=\count133
\l__tl_analysis_type_int=\count134
\l__regex_internal_a_int=\count135
\l__regex_internal_b_int=\count136
\l__regex_internal_c_int=\count137
\l__regex_balance_int=\count138
\l__regex_group_level_int=\count139
\l__regex_mode_int=\count140
\c__regex_cs_in_class_mode_int=\count141
\c__regex_cs_mode_int=\count142
\l__regex_catcodes_int=\count143
\l__regex_default_catcodes_int=\count144
\c__regex_catcode_D_int=\count145
\c__regex_catcode_S_int=\count146
\c__regex_catcode_L_int=\count147
\c__regex_catcode_O_int=\count148
\c__regex_catcode_A_int=\count149
\c__regex_all_catcodes_int=\count150
\l__regex_show_lines_int=\count151
\l__regex_min_state_int=\count152
\l__regex_max_state_int=\count153
\l__regex_left_state_int=\count154
\l__regex_right_state_int=\count155
\l__regex_capturing_group_int=\count156
\l__regex_min_pos_int=\count157
\l__regex_max_pos_int=\count158
\l__regex_curr_pos_int=\count159
\l__regex_start_pos_int=\count160
\l__regex_success_pos_int=\count161
\l__regex_curr_char_int=\count162
\l__regex_curr_catcode_int=\count163
\l__regex_last_char_int=\count164
\l__regex_case_changed_char_int=\count165
\l__regex_curr_state_int=\count166
\l__regex_step_int=\count167
\l__regex_min_active_int=\count168
\l__regex_max_active_int=\count169
\l__regex_replacement_csnames_int=\count170
\l__regex_match_count_int=\count171
\l__regex_min_submatch_int=\count172
\l__regex_submatch_int=\count173
\l__regex_zeroth_submatch_int=\count174
\g__regex_trace_regex_int=\count175
\c_empty_box=\box27
\l_tmpa_box=\box28
\l_tmpb_box=\box29
\g_tmpa_box=\box30
\g_tmpb_box=\box31
\l__box_top_dim=\dimen110
\l__box_bottom_dim=\dimen111
\l__box_left_dim=\dimen112
\l__box_right_dim=\dimen113
\l__box_top_new_dim=\dimen114
\l__box_bottom_new_dim=\dimen115
\l__box_left_new_dim=\dimen116
\l__box_right_new_dim=\dimen117
\l__box_internal_box=\box32
\l__coffin_internal_box=\box33
\l__coffin_internal_dim=\dimen118
\l__coffin_offset_x_dim=\dimen119
\l__coffin_offset_y_dim=\dimen120
\l__coffin_x_dim=\dimen121
\l__coffin_y_dim=\dimen122
\l__coffin_x_prime_dim=\dimen123
\l__coffin_y_prime_dim=\dimen124
\c_empty_coffin=\box34
\l__coffin_aligned_coffin=\box35
\l__coffin_aligned_internal_coffin=\box36
\l_tmpa_coffin=\box37
\l_tmpb_coffin=\box38
\g_tmpa_coffin=\box39
\g_tmpb_coffin=\box40
\l__coffin_bounding_shift_dim=\dimen125
\l__coffin_left_corner_dim=\dimen126
\l__coffin_right_corner_dim=\dimen127
\l__coffin_bottom_corner_dim=\dimen128
\l__coffin_top_corner_dim=\dimen129
\l__coffin_scaled_total_height_dim=\dimen130
\l__coffin_scaled_width_dim=\dimen131
\c__coffin_empty_coffin=\box41
\l__coffin_display_coffin=\box42
\l__coffin_display_coord_coffin=\box43
\l__coffin_display_pole_coffin=\box44
\l__coffin_display_offset_dim=\dimen132
\l__coffin_display_x_dim=\dimen133
\l__coffin_display_y_dim=\dimen134
\g__char_data_ior=\read1

("C:\Program Files\MiKTeX 2.9\tex/latex/l3kernel\l3deprecation.def"
File: l3deprecation.def 2019-04-06 v L3 Deprecated functions
))
("C:\Program Files\MiKTeX 2.9\tex/latex/l3backend\l3backend-pdfmode.def"
File: l3backend-pdfmode.def 2019-04-06 L3 backend support: PDF mode
\l__kernel_color_stack_int=\count176
\l__pdf_internal_box=\box45
))
("C:\Program Files\MiKTeX 2.9\tex/latex/l3packages/l3keys2e\l3keys2e.sty"
Package: l3keys2e 2019-10-11 LaTeX2e option processing using LaTeX3 keys
)
("C:\Program Files\MiKTeX 2.9\tex/latex/tools\calc.sty"
Package: calc 2017/05/25 v4.3 Infix arithmetic (KKT,FJ)
\calc@Acount=\count177
\calc@Bcount=\count178
\calc@Adimen=\dimen135
\calc@Bdimen=\dimen136
\calc@Askip=\skip51
\calc@Bskip=\skip52
LaTeX Info: Redefining \setlength on input line 80.
LaTeX Info: Redefining \addtolength on input line 81.
\calc@Ccount=\count179
\calc@Cskip=\skip53
)
("C:\Program Files\MiKTeX 2.9\tex/latex/amsmath\amsmath.sty"
Package: amsmath 2019/11/16 v2.17d AMS math features
\@mathmargin=\skip54

For additional information on amsmath, use the `?' option.
("C:\Program Files\MiKTeX 2.9\tex/latex/amsmath\amstext.sty"
Package: amstext 2000/06/29 v2.01 AMS text

("C:\Program Files\MiKTeX 2.9\tex/latex/amsmath\amsgen.sty"
File: amsgen.sty 1999/11/30 v2.0 generic functions
\@emptytoks=\toks14
\ex@=\dimen137
))
("C:\Program Files\MiKTeX 2.9\tex/latex/amsmath\amsbsy.sty"
Package: amsbsy 1999/11/29 v1.2d Bold Symbols
\pmbraise@=\dimen138
)
("C:\Program Files\MiKTeX 2.9\tex/latex/amsmath\amsopn.sty"
Package: amsopn 2016/03/08 v2.02 operator names
)
\inf@bad=\count180
LaTeX Info: Redefining \frac on input line 227.
\uproot@=\count181
\leftroot@=\count182
LaTeX Info: Redefining \overline on input line 389.
\classnum@=\count183
\DOTSCASE@=\count184
LaTeX Info: Redefining \ldots on input line 486.
LaTeX Info: Redefining \dots on input line 489.
LaTeX Info: Redefining \cdots on input line 610.
\Mathstrutbox@=\box46
\strutbox@=\box47
\big@size=\dimen139
LaTeX Font Info:    Redeclaring font encoding OML on input line 733.
LaTeX Font Info:    Redeclaring font encoding OMS on input line 734.
\macc@depth=\count185
\c@MaxMatrixCols=\count186
\dotsspace@=\muskip16
\c@parentequation=\count187
\dspbrk@lvl=\count188
\tag@help=\toks15
\row@=\count189
\column@=\count190
\maxfields@=\count191
\andhelp@=\toks16
\eqnshift@=\dimen140
\alignsep@=\dimen141
\tagshift@=\dimen142
\tagwidth@=\dimen143
\totwidth@=\dimen144
\lineht@=\dimen145
\@envbody=\toks17
\multlinegap=\skip55
\multlinetaggap=\skip56
\mathdisplay@stack=\toks18
LaTeX Info: Redefining \[ on input line 2858.
LaTeX Info: Redefining \] on input line 2859.
)
(C:\Users\klenow\AppData\Roaming\MiKTeX\2.9\tex/latex/chemgreek\chemgreek.sty
("C:\Program Files\MiKTeX 2.9\tex/latex/l3packages/xparse\xparse.sty"
Package: xparse 2019-10-11 L3 Experimental document command parser
\l__xparse_current_arg_int=\count192
\g__xparse_grabber_int=\count193
\l__xparse_m_args_int=\count194
\l__xparse_v_nesting_int=\count195
)
Package: chemgreek 2016/12/20 v1.1 interfaceforuprightgreeklettersforuseinchemi
stry (CN)
\l__chemgreek_tmpa_int=\count196
\g__chemgreek_tmpa_int=\count197
)
("C:\Program Files\MiKTeX 2.9\tex/latex/graphics\graphics.sty"
Package: graphics 2019/11/01 v1.3d Standard LaTeX Graphics (DPC,SPQR)

("C:\Program Files\MiKTeX 2.9\tex/latex/graphics\trig.sty"
Package: trig 2016/01/03 v1.10 sin cos tan (DPC)
)
("C:\Program Files\MiKTeX 2.9\tex/latex/graphics-cfg\graphics.cfg"
File: graphics.cfg 2016/06/04 v1.11 sample graphics configuration
)
Package graphics Info: Driver file: pdftex.def on input line 105.

("C:\Program Files\MiKTeX 2.9\tex/latex/graphics-def\pdftex.def"
File: pdftex.def 2018/01/08 v1.0l Graphics/color driver for pdftex
))
\l__mhchem_ce_distanceFromLastComma_int=\count198
\__mhchem_arrow_extPgfLength_skip=\skip57
\mhchem@minispace@tmp=\skip58
\mhchem@minibackspace@tmp=\skip59
\mhchem@bondwidth=\skip60
\mhchem@bondheight=\skip61
\mhchem@smallbondwidth@tmpA=\skip62
\mhchem@smallbondwidth@tmpB=\skip63
\mhchem@smallbondwidth=\skip64
\mhchem@bondtmp@minussidebearingleft=\skip65
\mhchem@bondtmp@minussidebearingright=\skip66
\l__mhchem_option_version_int=\count199
\mhchem@option@minusmathsidebearingleft=\dimen146
\mhchem@option@minusmathsidebearingright=\dimen147
\mhchem@option@minustextsidebearingleft=\dimen148
\mhchem@option@minustextsidebearingright=\dimen149
)
(C:\Users\klenow\AppData\Roaming\MiKTeX\2.9\tex/latex/geometry\geometry.sty
Package: geometry 2018/04/16 v5.8 Page Geometry

("C:\Program Files\MiKTeX 2.9\tex/latex/graphics\keyval.sty"
Package: keyval 2014/10/28 v1.15 key=value parser (DPC)
\KV@toks@=\toks19
)
("C:\Program Files\MiKTeX 2.9\tex/generic/iftex\ifpdf.sty"
Package: ifpdf 2019/10/25 v3.4 ifpdf legacy package. Use iftex instead.

("C:\Program Files\MiKTeX 2.9\tex/generic/iftex\iftex.sty"
Package: iftex 2019/11/07 v1.0c TeX engine tests
))
("C:\Program Files\MiKTeX 2.9\tex/generic/iftex\ifvtex.sty"
Package: ifvtex 2019/10/25 v1.7 ifvtex legacy package. Use iftex instead.
)
("C:\Program Files\MiKTeX 2.9\tex/generic/iftex\ifxetex.sty"
Package: ifxetex 2019/10/25 v0.7 ifxetex legacy package. Use iftex instead.
)
\Gm@cnth=\count266
\Gm@cntv=\count267
\c@Gm@tempcnt=\count268
\Gm@bindingoffset=\dimen150
\Gm@wd@mp=\dimen151
\Gm@odd@mp=\dimen152
\Gm@even@mp=\dimen153
\Gm@layoutwidth=\dimen154
\Gm@layoutheight=\dimen155
\Gm@layouthoffset=\dimen156
\Gm@layoutvoffset=\dimen157
\Gm@dimlist=\toks20

(C:\Users\klenow\AppData\Roaming\MiKTeX\2.9\tex/latex/geometry\geometry.cfg))
(C:\Users\klenow\AppData\Roaming\MiKTeX\2.9\tex/latex/preprint\balance.sty
Package: balance 1999/02/23 4.3 (PWD)
\oldvsize=\dimen158
)
(C:\Users\klenow\AppData\Roaming\MiKTeX\2.9\tex/latex/psnfss\times.sty
Package: times 2005/04/12 PSNFSS-v9.2a (SPQR) 
)
(C:\Users\klenow\AppData\Roaming\MiKTeX\2.9\tex/latex/psnfss\mathptmx.sty
Package: mathptmx 2005/04/12 PSNFSS-v9.2a Times w/ Math, improved (SPQR, WaS) 
LaTeX Font Info:    Redeclaring symbol font `operators' on input line 28.
LaTeX Font Info:    Overwriting symbol font `operators' in version `normal'
(Font)                  OT1/cmr/m/n --> OT1/ztmcm/m/n on input line 28.
LaTeX Font Info:    Overwriting symbol font `operators' in version `bold'
(Font)                  OT1/cmr/bx/n --> OT1/ztmcm/m/n on input line 28.
LaTeX Font Info:    Redeclaring symbol font `letters' on input line 29.
LaTeX Font Info:    Overwriting symbol font `letters' in version `normal'
(Font)                  OML/cmm/m/it --> OML/ztmcm/m/it on input line 29.
LaTeX Font Info:    Overwriting symbol font `letters' in version `bold'
(Font)                  OML/cmm/b/it --> OML/ztmcm/m/it on input line 29.
LaTeX Font Info:    Redeclaring symbol font `symbols' on input line 30.
LaTeX Font Info:    Overwriting symbol font `symbols' in version `normal'
(Font)                  OMS/cmsy/m/n --> OMS/ztmcm/m/n on input line 30.
LaTeX Font Info:    Overwriting symbol font `symbols' in version `bold'
(Font)                  OMS/cmsy/b/n --> OMS/ztmcm/m/n on input line 30.
LaTeX Font Info:    Redeclaring symbol font `largesymbols' on input line 31.
LaTeX Font Info:    Overwriting symbol font `largesymbols' in version `normal'
(Font)                  OMX/cmex/m/n --> OMX/ztmcm/m/n on input line 31.
LaTeX Font Info:    Overwriting symbol font `largesymbols' in version `bold'
(Font)                  OMX/cmex/m/n --> OMX/ztmcm/m/n on input line 31.
\symbold=\mathgroup4
\symitalic=\mathgroup5
LaTeX Font Info:    Redeclaring math alphabet \mathbf on input line 34.
LaTeX Font Info:    Overwriting math alphabet `\mathbf' in version `normal'
(Font)                  OT1/cmr/bx/n --> OT1/ptm/bx/n on input line 34.
LaTeX Font Info:    Overwriting math alphabet `\mathbf' in version `bold'
(Font)                  OT1/cmr/bx/n --> OT1/ptm/bx/n on input line 34.
LaTeX Font Info:    Redeclaring math alphabet \mathit on input line 35.
LaTeX Font Info:    Overwriting math alphabet `\mathit' in version `normal'
(Font)                  OT1/cmr/m/it --> OT1/ptm/m/it on input line 35.
LaTeX Font Info:    Overwriting math alphabet `\mathit' in version `bold'
(Font)                  OT1/cmr/bx/it --> OT1/ptm/m/it on input line 35.
LaTeX Info: Redefining \hbar on input line 50.
)
(C:\Users\klenow\AppData\Roaming\MiKTeX\2.9\tex/latex/sectsty\sectsty.sty
Package: sectsty 2002/02/25 v2.0.2 Commands to change all sectional heading sty
les


LaTeX Warning: Command \underbar  has changed.
               Check if current package is valid.


LaTeX Warning: Command \underline  has changed.
               Check if current package is valid.

) ("C:\Program Files\MiKTeX 2.9\tex/latex/graphics\graphicx.sty"
Package: graphicx 2017/06/01 v1.1a Enhanced LaTeX Graphics (DPC,SPQR)
\Gin@req@height=\dimen159
\Gin@req@width=\dimen160
)
(C:\Users\klenow\AppData\Roaming\MiKTeX\2.9\tex/latex/lastpage\lastpage.sty
Package: lastpage 2015/03/29 v1.2m Refers to last page's name (HMM; JPG)
)
(C:\Users\klenow\AppData\Roaming\MiKTeX\2.9\tex/latex/caption\caption.sty
Package: caption 2019/10/18 v3.4a Customizing captions (AR)

(C:\Users\klenow\AppData\Roaming\MiKTeX\2.9\tex/latex/caption\caption3.sty
Package: caption3 2019/09/09 v1.8e caption3 kernel (AR)
Package caption3 Info: TeX engine: e-TeX on input line 64.
\captionmargin=\dimen161
\captionmargin@=\dimen162
\captionwidth=\dimen163
\caption@tempdima=\dimen164
\caption@indent=\dimen165
\caption@parindent=\dimen166
\caption@hangindent=\dimen167
Package caption Info: Standard document class detected.
)
\c@caption@flags=\count269
\c@continuedfloat=\count270
)
(C:\Users\klenow\AppData\Roaming\MiKTeX\2.9\tex/latex/float\float.sty
Package: float 2001/11/08 v1.3d Float enhancements (AL)
\c@float@type=\count271
\float@exts=\toks21
\float@box=\box48
\@float@everytoks=\toks22
\@floatcapt=\box49
)
(C:\Users\klenow\AppData\Roaming\MiKTeX\2.9\tex/latex/fancyhdr\fancyhdr.sty
Package: fancyhdr 2019/01/31 v3.10 Extensive control of page headers and footer
s
\f@nch@headwidth=\skip67
\f@nch@O@elh=\skip68
\f@nch@O@erh=\skip69
\f@nch@O@olh=\skip70
\f@nch@O@orh=\skip71
\f@nch@O@elf=\skip72
\f@nch@O@erf=\skip73
\f@nch@O@olf=\skip74
\f@nch@O@orf=\skip75
)
(C:\Users\klenow\AppData\Roaming\MiKTeX\2.9\tex/latex/yafoot\fnpos.sty
Package: fnpos 2018/09/03 v1.1 
)
("C:\Program Files\MiKTeX 2.9\tex/generic/babel\babel.sty"
Package: babel 2019/11/14 3.36 The Babel package

("C:\Program Files\MiKTeX 2.9\tex/generic/babel\switch.def"
File: switch.def 2019/11/14 3.36 Babel switching mechanism
)
*************************************
* Local config file bblopts.cfg used
*
("C:\Program Files\MiKTeX 2.9\tex/latex/arabi\bblopts.cfg"
File: bblopts.cfg 2005/09/08 v0.1 add Arabic and Farsi to "declared" options of
 babel
)
("C:\Program Files\MiKTeX 2.9\tex/latex/babel-english\english.ldf"
Language: english 2017/06/06 v3.3r English support from the babel system

("C:\Program Files\MiKTeX 2.9\tex/generic/babel\babel.def"
File: babel.def 2019/11/14 3.36 Babel common definitions
\babel@savecnt=\count272
\U@D=\dimen168

("C:\Program Files\MiKTeX 2.9\tex/generic/babel\txtbabel.def")
\bbl@dirlevel=\count273
)
Package babel Info: \l@canadian = using hyphenrules for english
(babel)             (\language0) on input line 102.
Package babel Info: \l@australian = using hyphenrules for ukenglish
(babel)             (\language72) on input line 105.
Package babel Info: \l@newzealand = using hyphenrules for ukenglish
(babel)             (\language72) on input line 108.
))
("C:\Program Files\MiKTeX 2.9\tex/latex/tools\array.sty"
Package: array 2019/08/31 v2.4l Tabular extension package (FMi)
\col@sep=\dimen169
\ar@mcellbox=\box50
\extrarowheight=\dimen170
\NC@list=\toks23
\extratabsurround=\skip76
\backup@length=\skip77
\ar@cellbox=\box51
)
(C:\Users\klenow\AppData\Roaming\MiKTeX\2.9\tex/latex/droid\droidsans.sty
Package: droidsans 2019/06/20 Style file for Droid Sans.

("C:\Program Files\MiKTeX 2.9\tex/generic/iftex\ifluatex.sty"
Package: ifluatex 2019/10/25 v1.5 ifluatex legacy package. Use iftex instead.
)
("C:\Program Files\MiKTeX 2.9\tex/latex/xkeyval\xkeyval.sty"
Package: xkeyval 2014/12/03 v2.7a package option processing (HA)

("C:\Program Files\MiKTeX 2.9\tex/generic/xkeyval\xkeyval.tex"
("C:\Program Files\MiKTeX 2.9\tex/generic/xkeyval\xkvutils.tex"
\XKV@toks=\toks24
\XKV@tempa@toks=\toks25
)
\XKV@depth=\count274
File: xkeyval.tex 2014/12/03 v2.7a key=value parser (HA)
)))
(C:\Users\klenow\AppData\Roaming\MiKTeX\2.9\tex/latex/psnfss\charter.sty
Package: charter 2005/04/12 PSNFSS-v9.2a (P.Dyballa) 
)
("C:\Program Files\MiKTeX 2.9\tex/latex/base\fontenc.sty"
Package: fontenc 2018/08/11 v2.0j Standard LaTeX package

("C:\Program Files\MiKTeX 2.9\tex/latex/base\t1enc.def"
File: t1enc.def 2018/08/11 v2.0j Standard LaTeX file
LaTeX Font Info:    Redeclaring font encoding T1 on input line 48.
))
("C:\Program Files\MiKTeX 2.9\tex/latex/xcolor\xcolor.sty"
Package: xcolor 2016/05/11 v2.12 LaTeX color extensions (UK)

("C:\Program Files\MiKTeX 2.9\tex/latex/graphics-cfg\color.cfg"
File: color.cfg 2016/01/02 v1.6 sample color configuration
)
Package xcolor Info: Package option `usenames' ignored on input line 216.
Package xcolor Info: Driver file: pdftex.def on input line 225.
Package xcolor Info: Model `cmy' substituted by `cmy0' on input line 1348.
Package xcolor Info: Model `hsb' substituted by `rgb' on input line 1352.
Package xcolor Info: Model `RGB' extended on input line 1364.
Package xcolor Info: Model `HTML' substituted by `rgb' on input line 1366.
Package xcolor Info: Model `Hsb' substituted by `hsb' on input line 1367.
Package xcolor Info: Model `tHsb' substituted by `hsb' on input line 1368.
Package xcolor Info: Model `HSB' substituted by `hsb' on input line 1369.
Package xcolor Info: Model `Gray' substituted by `gray' on input line 1370.
Package xcolor Info: Model `wave' substituted by `hsb' on input line 1371.

("C:\Program Files\MiKTeX 2.9\tex/latex/graphics\dvipsnam.def"
File: dvipsnam.def 2016/06/17 v3.0m Driver-dependent file (DPC,SPQR)
))
(C:\Users\klenow\AppData\Roaming\MiKTeX\2.9\tex/latex/setspace\setspace.sty
Package: setspace 2011/12/19 v6.7a set line spacing
)
(C:\Users\klenow\AppData\Roaming\MiKTeX\2.9\tex/latex/titlesec\titlesec.sty
Package: titlesec 2019/10/16 v2.13 Sectioning titles
\ttl@box=\box52
\beforetitleunit=\skip78
\aftertitleunit=\skip79
\ttl@plus=\dimen171
\ttl@minus=\dimen172
\ttl@toksa=\toks26
\titlewidth=\dimen173
\titlewidthlast=\dimen174
\titlewidthfirst=\dimen175
)
("C:\Program Files\MiKTeX 2.9\tex/latex/hyperref\hyperref.sty"
Package: hyperref 2019/11/10 v7.00c Hypertext links for LaTeX

("C:\Program Files\MiKTeX 2.9\tex/generic/oberdiek\ltxcmds.sty"
Package: ltxcmds 2016/05/16 v1.23 LaTeX kernel commands for general use (HO)
)
("C:\Program Files\MiKTeX 2.9\tex/latex/pdftexcmds\pdftexcmds.sty"
Package: pdftexcmds 2019/11/24 v0.31 Utility functions of pdfTeX for LuaTeX (HO
)

(C:\Users\klenow\AppData\Roaming\MiKTeX\2.9\tex/generic/infwarerr\infwarerr.sty
Package: infwarerr 2019/12/03 v1.5 Providing info/warning/error messages (HO)
)
Package pdftexcmds Info: \pdf@primitive is available.
Package pdftexcmds Info: \pdf@ifprimitive is available.
Package pdftexcmds Info: \pdfdraftmode found.
) ("C:\Program Files\MiKTeX 2.9\tex/generic/oberdiek\kvsetkeys.sty"
Package: kvsetkeys 2016/05/16 v1.17 Key value parser (HO)

("C:\Program Files\MiKTeX 2.9\tex/generic/oberdiek\etexcmds.sty"
Package: etexcmds 2016/05/16 v1.6 Avoid name clashes with e-TeX commands (HO)
))
("C:\Program Files\MiKTeX 2.9\tex/generic/oberdiek\kvdefinekeys.sty"
Package: kvdefinekeys 2016/05/16 v1.4 Define keys (HO)
)
("C:\Program Files\MiKTeX 2.9\tex/generic/oberdiek\pdfescape.sty"
Package: pdfescape 2016/05/16 v1.14 Implements pdfTeX's escape features (HO)
)
("C:\Program Files\MiKTeX 2.9\tex/latex/oberdiek\hycolor.sty"
Package: hycolor 2016/05/16 v1.8 Color options for hyperref/bookmark (HO)

("C:\Program Files\MiKTeX 2.9\tex/latex/oberdiek\xcolor-patch.sty"
Package: xcolor-patch 2016/05/16 xcolor patch

("C:\Program Files\MiKTeX 2.9\tex/latex/oberdiek\hopatch.sty"
Package: hopatch 2016/05/16 v1.3 Wrapper for package hooks (HO)
)))
(C:\Users\klenow\AppData\Roaming\MiKTeX\2.9\tex/latex/letltxmacro\letltxmacro.s
ty
Package: letltxmacro 2019/12/03 v1.6 Let assignment for LaTeX macros (HO)
) ("C:\Program Files\MiKTeX 2.9\tex/latex/oberdiek\auxhook.sty"
Package: auxhook 2016/05/16 v1.4 Hooks for auxiliary files (HO)
)
(C:\Users\klenow\AppData\Roaming\MiKTeX\2.9\tex/latex/kvoptions\kvoptions.sty
Package: kvoptions 2019/11/29 v3.13 Key value format for package options (HO)
)
\@linkdim=\dimen176
\Hy@linkcounter=\count275
\Hy@pagecounter=\count276

("C:\Program Files\MiKTeX 2.9\tex/latex/hyperref\pd1enc.def"
File: pd1enc.def 2019/11/10 v7.00c Hyperref: PDFDocEncoding definition (HO)
Now handling font encoding PD1 ...
... no UTF-8 mapping file for font encoding PD1
)
("C:\Program Files\MiKTeX 2.9\tex/generic/oberdiek\intcalc.sty"
Package: intcalc 2016/05/16 v1.2 Expandable calculations with integers (HO)
)
\Hy@SavedSpaceFactor=\count277

("C:\Program Files\MiKTeX 2.9\tex/latex/00miktex\hyperref.cfg"
File: hyperref.cfg 2002/06/06 v1.2 hyperref configuration of TeXLive
)
Package hyperref Info: Hyper figures OFF on input line 4535.
Package hyperref Info: Link nesting OFF on input line 4540.
Package hyperref Info: Hyper index ON on input line 4543.
Package hyperref Info: Plain pages OFF on input line 4550.
Package hyperref Info: Backreferencing OFF on input line 4555.
Package hyperref Info: Implicit mode ON; LaTeX internals redefined.
Package hyperref Info: Bookmarks ON on input line 4788.
\c@Hy@tempcnt=\count278

("C:\Program Files\MiKTeX 2.9\tex/latex/url\url.sty"
\Urlmuskip=\muskip17
Package: url 2013/09/16  ver 3.4  Verb mode for urls, etc.
)
LaTeX Info: Redefining \url on input line 5147.
\XeTeXLinkMargin=\dimen177

("C:\Program Files\MiKTeX 2.9\tex/generic/oberdiek\bitset.sty"
Package: bitset 2016/05/16 v1.2 Handle bit-vector datatype (HO)

("C:\Program Files\MiKTeX 2.9\tex/generic/oberdiek\bigintcalc.sty"
Package: bigintcalc 2016/05/16 v1.4 Expandable calculations on big integers (HO
)
))
\Fld@menulength=\count279
\Field@Width=\dimen178
\Fld@charsize=\dimen179
Package hyperref Info: Hyper figures OFF on input line 6418.
Package hyperref Info: Link nesting OFF on input line 6423.
Package hyperref Info: Hyper index ON on input line 6426.
Package hyperref Info: backreferencing OFF on input line 6433.
Package hyperref Info: Link coloring OFF on input line 6438.
Package hyperref Info: Link coloring with OCG OFF on input line 6443.
Package hyperref Info: PDF/A mode OFF on input line 6448.
LaTeX Info: Redefining \ref on input line 6488.
LaTeX Info: Redefining \pageref on input line 6492.

("C:\Program Files\MiKTeX 2.9\tex/generic/oberdiek\atbegshi.sty"
Package: atbegshi 2016/06/09 v1.18 At begin shipout hook (HO)
)
\Hy@abspage=\count280
\c@Item=\count281
\c@Hfootnote=\count282
)
Package hyperref Info: Driver (autodetected): hpdftex.

("C:\Program Files\MiKTeX 2.9\tex/latex/hyperref\hpdftex.def"
File: hpdftex.def 2019/11/10 v7.00c Hyperref driver for pdfTeX

("C:\Program Files\MiKTeX 2.9\tex/latex/oberdiek\atveryend.sty"
Package: atveryend 2016/05/16 v1.9 Hooks at the very end of document (HO)
Package atveryend Info: \enddocument detected (standard20110627).
)
\Fld@listcount=\count283
\c@bookmark@seq@number=\count284

("C:\Program Files\MiKTeX 2.9\tex/latex/oberdiek\rerunfilecheck.sty"
Package: rerunfilecheck 2016/05/16 v1.8 Rerun checks for auxiliary files (HO)

("C:\Program Files\MiKTeX 2.9\tex/generic/oberdiek\uniquecounter.sty"
Package: uniquecounter 2016/05/16 v1.3 Provide unlimited unique counter (HO)
)
Package uniquecounter Info: New unique counter `rerunfilecheck' on input line 2
86.
)
\Hy@SectionHShift=\skip80
)
("C:\Program Files\MiKTeX 2.9\tex/latex/epstopdf-pkg\epstopdf.sty"
Package: epstopdf 2019-11-30 v2.9 Conversion with epstopdf on the fly (HO)

(C:\Users\klenow\AppData\Roaming\MiKTeX\2.9\tex/latex/grfext\grfext.sty
Package: grfext 2019/12/03 v1.3 Manage graphics extensions (HO)
)
("C:\Program Files\MiKTeX 2.9\tex/latex/epstopdf-pkg\epstopdf-base.sty"
Package: epstopdf-base 2019-11-30 v2.9 Base part for package epstopdf
Package epstopdf-base Info: Redefining graphics rule for `.eps' on input line 4
85.
Package grfext Info: Graphics extension search list:
(grfext)             [.pdf,.png,.jpg,.mps,.jpeg,.jbig2,.jb2,.PDF,.PNG,.JPG,.JPE
G,.JBIG2,.JB2,.eps]
(grfext)             \AppendGraphicsExtensions on input line 504.
))
(C:\Users\klenow\AppData\Roaming\MiKTeX\2.9\tex/latex/ulem\ulem.sty
\UL@box=\box53
\UL@hyphenbox=\box54
\UL@skip=\skip81
\UL@hook=\toks27
\UL@height=\dimen180
\UL@pe=\count285
\UL@pixel=\dimen181
\ULC@box=\box55
Package: ulem 2012/05/18
\ULdepth=\dimen182
)
("C:\Program Files\MiKTeX 2.9\tex/latex/oberdiek\settobox.sty"
Package: settobox 2016/05/16 v1.5 Assign box dimensions to length registers (HO
)
)
\DIFdelgraphicsbox=\box56
\DIFdelgraphicswidth=\skip82
\DIFdelgraphicsheight=\skip83
LaTeX Info: Redefining \DIFaddbegin on input line 93.
LaTeX Info: Redefining \DIFaddend on input line 94.
LaTeX Info: Redefining \DIFdelbegin on input line 95.
LaTeX Info: Redefining \DIFdelend on input line 96.
LaTeX Info: Redefining \DIFaddbeginFL on input line 101.
LaTeX Info: Redefining \DIFaddendFL on input line 102.
LaTeX Info: Redefining \DIFdelbeginFL on input line 103.
LaTeX Info: Redefining \DIFdelendFL on input line 104.

(C:\Users\klenow\AppData\Roaming\MiKTeX\2.9\tex/latex/listings\listings.sty
\lst@mode=\count286
\lst@gtempboxa=\box57
\lst@token=\toks28
\lst@length=\count287
\lst@currlwidth=\dimen183
\lst@column=\count288
\lst@pos=\count289
\lst@lostspace=\dimen184
\lst@width=\dimen185
\lst@newlines=\count290
\lst@lineno=\count291
\lst@maxwidth=\dimen186

(C:\Users\klenow\AppData\Roaming\MiKTeX\2.9\tex/latex/listings\lstmisc.sty
File: lstmisc.sty 2019/09/10 1.8c (Carsten Heinz)
\c@lstnumber=\count292
\lst@skipnumbers=\count293
\lst@framebox=\box58
)
(C:\Users\klenow\AppData\Roaming\MiKTeX\2.9\tex/latex/listings\listings.cfg
File: listings.cfg 2019/09/10 1.8c listings configuration
))
Package: listings 2019/09/10 1.8c (Carsten Heinz)

(Article_Revised_Diff.aux)
\openout1 = `Article_Revised_Diff.aux'.

LaTeX Font Info:    Checking defaults for OML/cmm/m/it on input line 123.
LaTeX Font Info:    ... okay on input line 123.
LaTeX Font Info:    Checking defaults for T1/cmr/m/n on input line 123.
LaTeX Font Info:    ... okay on input line 123.
LaTeX Font Info:    Checking defaults for OT1/cmr/m/n on input line 123.
LaTeX Font Info:    ... okay on input line 123.
LaTeX Font Info:    Checking defaults for OMS/cmsy/m/n on input line 123.
LaTeX Font Info:    ... okay on input line 123.
LaTeX Font Info:    Checking defaults for OMX/cmex/m/n on input line 123.
LaTeX Font Info:    ... okay on input line 123.
LaTeX Font Info:    Checking defaults for U/cmr/m/n on input line 123.
LaTeX Font Info:    ... okay on input line 123.
LaTeX Font Info:    Checking defaults for PD1/pdf/m/n on input line 123.
LaTeX Font Info:    ... okay on input line 123.
LaTeX Font Info:    Trying to load font information for T1+bch on input line 12
3.

(C:\Users\klenow\AppData\Roaming\MiKTeX\2.9\tex/latex/psnfss\t1bch.fd
File: t1bch.fd 2004/10/18 font definitions for T1/bch.
)

Package chemgreek Info: Activating mapping `default' on line 123.


("C:\Program Files\MiKTeX 2.9\tex/context/base/mkii\supp-pdf.mkii"
[Loading MPS to PDF converter (version 2006.09.02).]
\scratchcounter=\count294
\scratchdimen=\dimen187
\scratchbox=\box59
\nofMPsegments=\count295
\nofMParguments=\count296
\everyMPshowfont=\toks29
\MPscratchCnt=\count297
\MPscratchDim=\dimen188
\MPnumerator=\count298
\makeMPintoPDFobject=\count299
\everyMPtoPDFconversion=\toks30
)
*geometry* driver: auto-detecting
*geometry* detected driver: pdftex
*geometry* verbose mode - [ preamble ] result:
* driver: pdftex
* paper: <default>
* layout: <same size as paper>
* layoutoffset:(h,v)=(0.0pt,0.0pt)
* modes: twoside 
* h-part:(L,W,R)=(42.67912pt, 528.93675pt, 42.67912pt)
* v-part:(T,H,B)=(50.78827pt, 687.27621pt, 56.9055pt)
* \paperwidth=614.295pt
* \paperheight=794.96999pt
* \textwidth=528.93675pt
* \textheight=687.27621pt
* \oddsidemargin=-29.59087pt
* \evensidemargin=-29.59087pt
* \topmargin=-58.48172pt
* \headheight=12.0pt
* \headsep=25.0pt
* \topskip=9.0pt
* \footskip=30.0pt
* \marginparwidth=48.0pt
* \marginparsep=10.0pt
* \columnsep=10.0pt
* \skip\footins=8.0pt plus 4.0pt minus 2.0pt
* \hoffset=0.0pt
* \voffset=0.0pt
* \mag=1000
* \@twocolumntrue
* \@twosidetrue
* \@mparswitchtrue
* \@reversemarginfalse
* (1in=72.27pt=25.4mm, 1cm=28.453pt)

Package lastpage Info: Please have a look at the pageslts package at
(lastpage)             https://www.ctan.org/pkg/pageslts
(lastpage)             ! on input line 123.
Package caption Info: Begin \AtBeginDocument code.
Package caption Info: float package is loaded.
Package caption Info: hyperref package is loaded.
Package caption Info: listings package is loaded.
Package caption Info: End \AtBeginDocument code.
\AtBeginShipoutBox=\box60
Package hyperref Info: Link coloring OFF on input line 123.
("C:\Program Files\MiKTeX 2.9\tex/latex/hyperref\nameref.sty"
Package: nameref 2019/09/16 v2.46 Cross-referencing by name of section

("C:\Program Files\MiKTeX 2.9\tex/latex/oberdiek\refcount.sty"
Package: refcount 2016/05/16 v3.5 Data extraction from label references (HO)
)
("C:\Program Files\MiKTeX 2.9\tex/generic/oberdiek\gettitlestring.sty"
Package: gettitlestring 2016/05/16 v1.5 Cleanup title references (HO)
)
\c@section@level=\count300
)
LaTeX Info: Redefining \ref on input line 123.
LaTeX Info: Redefining \pageref on input line 123.
LaTeX Info: Redefining \nameref on input line 123.

(Article_Revised_Diff.out) (Article_Revised_Diff.out)
\@outlinefile=\write3
\openout3 = `Article_Revised_Diff.out'.

\c@lstlisting=\count301
\figrulesep=\skip84
LaTeX Font Info:    Trying to load font information for T1+phv on input line 22
7.

(C:\Users\klenow\AppData\Roaming\MiKTeX\2.9\tex/latex/psnfss\t1phv.fd
File: t1phv.fd 2001/06/04 scalable font definitions for T1/phv.
)
LaTeX Font Info:    Trying to load font information for OT1+ztmcm on input line
 227.

(C:\Users\klenow\AppData\Roaming\MiKTeX\2.9\tex/latex/psnfss\ot1ztmcm.fd
File: ot1ztmcm.fd 2000/01/03 Fontinst v1.801 font definitions for OT1/ztmcm.
)
LaTeX Font Info:    Trying to load font information for OML+ztmcm on input line
 227.

(C:\Users\klenow\AppData\Roaming\MiKTeX\2.9\tex/latex/psnfss\omlztmcm.fd
File: omlztmcm.fd 2000/01/03 Fontinst v1.801 font definitions for OML/ztmcm.
)
LaTeX Font Info:    Trying to load font information for OMS+ztmcm on input line
 227.

(C:\Users\klenow\AppData\Roaming\MiKTeX\2.9\tex/latex/psnfss\omsztmcm.fd
File: omsztmcm.fd 2000/01/03 Fontinst v1.801 font definitions for OMS/ztmcm.
)
LaTeX Font Info:    Trying to load font information for OMX+ztmcm on input line
 227.

(C:\Users\klenow\AppData\Roaming\MiKTeX\2.9\tex/latex/psnfss\omxztmcm.fd
File: omxztmcm.fd 2000/01/03 Fontinst v1.801 font definitions for OMX/ztmcm.
)
LaTeX Font Info:    Trying to load font information for OT1+ptm on input line 2
27.

(C:\Users\klenow\AppData\Roaming\MiKTeX\2.9\tex/latex/psnfss\ot1ptm.fd
File: ot1ptm.fd 2001/06/04 font definitions for OT1/ptm.
)
LaTeX Font Info:    Font shape `OT1/ptm/bx/n' in size <9> not available
(Font)              Font shape `OT1/ptm/b/n' tried instead on input line 227.
LaTeX Font Info:    Font shape `OT1/ptm/bx/n' in size <7> not available
(Font)              Font shape `OT1/ptm/b/n' tried instead on input line 227.
LaTeX Font Info:    Font shape `OT1/ptm/bx/n' in size <5> not available
(Font)              Font shape `OT1/ptm/b/n' tried instead on input line 227.
<head_foot/DOI.pdf, id=3, 118.041pt x 9.8769pt>
File: head_foot/DOI.pdf Graphic file (type pdf)
<use head_foot/DOI.pdf>
Package pdftex.def Info: head_foot/DOI.pdf  used on input line 227.
(pdftex.def)             Requested size: 118.0407pt x 9.87688pt.
LaTeX Font Info:    Calculating math sizes for size <15> on input line 227.
LaTeX Font Info:    Font shape `OT1/ptm/bx/n' in size <15> not available
(Font)              Font shape `OT1/ptm/b/n' tried instead on input line 227.
LaTeX Font Info:    Font shape `OT1/ptm/bx/n' in size <11.10008> not available
(Font)              Font shape `OT1/ptm/b/n' tried instead on input line 227.
LaTeX Font Info:    Font shape `OT1/ptm/bx/n' in size <9.00009> not available
(Font)              Font shape `OT1/ptm/b/n' tried instead on input line 227.
LaTeX Font Info:    Font shape `OT1/ptm/bx/n' in size <10> not available
(Font)              Font shape `OT1/ptm/b/n' tried instead on input line 227.
LaTeX Font Info:    Font shape `OT1/ptm/bx/n' in size <7.4> not available
(Font)              Font shape `OT1/ptm/b/n' tried instead on input line 227.
LaTeX Font Info:    Font shape `OT1/ptm/bx/n' in size <6> not available
(Font)              Font shape `OT1/ptm/b/n' tried instead on input line 227.
LaTeX Font Info:    Font shape `T1/phv/m/it' in size <10> not available
(Font)              Font shape `T1/phv/m/sl' tried instead on input line 227.
<head_foot/dates.pdf, id=4, 79.13565pt x 64.19984pt>
File: head_foot/dates.pdf Graphic file (type pdf)
<use head_foot/dates.pdf>
Package pdftex.def Info: head_foot/dates.pdf  used on input line 227.
(pdftex.def)             Requested size: 79.13544pt x 64.19968pt.

Overfull \hbox (7.21284pt too wide) in paragraph at lines 227--227
[][] 
 []


Package hyperref Warning: Ignoring empty anchor on input line 242.


Package hyperref Warning: Ignoring empty anchor on input line 248.

LaTeX Font Info:    Trying to load font information for OMS+bch on input line 2
48.
(C:\Users\klenow\AppData\Roaming\MiKTeX\2.9\tex/latex/psnfss\omsbch.fd
File: omsbch.fd 
)
LaTeX Font Info:    Font shape `OMS/bch/m/n' in size <7> not available
(Font)              Font shape `OMS/cmsy/m/n' tried instead on input line 248.

Underfull \vbox (badness 1072) has occurred while \output is active []

<head_foot/journal_name.pdf, id=27, 227.6505pt x 45.2892pt>
File: head_foot/journal_name.pdf Graphic file (type pdf)
<use head_foot/journal_name.pdf>
Package pdftex.def Info: head_foot/journal_name.pdf  used on input line 302.
(pdftex.def)             Requested size: 150.79515pt x 30.0pt.
<head_foot/header_bar.pdf, id=28, 512.1534pt x 36.135pt>
File: head_foot/header_bar.pdf Graphic file (type pdf)
<use head_foot/header_bar.pdf>
Package pdftex.def Info: head_foot/header_bar.pdf  used on input line 302.
(pdftex.def)             Requested size: 526.37598pt x 37.14003pt.


pdfTeX warning: pdflatex (file ./head_foot/RSC_LOGO_CMYK.pdf): PDF inclusion: f
ound PDF version <1.6>, but at most version <1.5> allowed
<head_foot/RSC_LOGO_CMYK.pdf, id=29, 275.0506pt x 183.22552pt>
File: head_foot/RSC_LOGO_CMYK.pdf Graphic file (type pdf)
<use head_foot/RSC_LOGO_CMYK.pdf>
Package pdftex.def Info: head_foot/RSC_LOGO_CMYK.pdf  used on input line 302.
(pdftex.def)             Requested size: 82.56197pt x 55.0pt.


pdfTeX warning: pdflatex (file ./head_foot/LF.pdf): PDF inclusion: found PDF ve
rsion <1.6>, but at most version <1.5> allowed
<head_foot/LF.pdf, id=30, 154.53032pt x 8.28976pt>
File: head_foot/LF.pdf Graphic file (type pdf)
<use head_foot/LF.pdf>
Package pdftex.def Info: head_foot/LF.pdf  used on input line 302.
(pdftex.def)             Requested size: 167.78156pt x 9.0pt.
<head_foot/RF.pdf, id=31, 90.45795pt x 7.4679pt>
File: head_foot/RF.pdf Graphic file (type pdf)
<use head_foot/RF.pdf>
Package pdftex.def Info: head_foot/RF.pdf  used on input line 302.
(pdftex.def)             Requested size: 90.4577pt x 7.46786pt.
[1{C:/Users/klenow/AppData/Local/MiKTeX/2.9/pdftex/config/pdftex.map}


 <./head_foot/journal_name.pdf> <./head_foot/header_bar.pdf> <./head_foot/RSC_L
OGO_CMYK.pdf> <./head_foot/DOI.pdf> <./head_foot/dates.pdf> <./head_foot/LF.pdf
> <./head_foot/RF.pdf>]
Underfull \hbox (badness 1043) in paragraph at lines 415--453
|   []   |   []   |   []   |   []   |   []   |   []   |   []
 []

File: head_foot/RF.pdf Graphic file (type pdf)
<use head_foot/RF.pdf>
Package pdftex.def Info: head_foot/RF.pdf  used on input line 453.
(pdftex.def)             Requested size: 90.4577pt x 7.46786pt.
File: head_foot/LF.pdf Graphic file (type pdf)
<use head_foot/LF.pdf>
Package pdftex.def Info: head_foot/LF.pdf  used on input line 453.
(pdftex.def)             Requested size: 167.78156pt x 9.0pt.
[2]
Underfull \hbox (badness 10000) in paragraph at lines 454--456

 []


Underfull \hbox (badness 10000) in paragraph at lines 459--469
\T1/bch/m/n/9 2(9Z-octadecenoyl)-sn-glycero-3-phosphocholine) and Phos-
 []


Underfull \hbox (badness 10000) in paragraph at lines 459--469
\T1/bch/m/n/9 phatidylser-ine (POPS; 1-hexadecanoyl-2(9Z-octadecenoyl)-
 []


Underfull \hbox (badness 10000) in paragraph at lines 459--469
\T1/bch/m/n/9 sn-glycero-3-phospho-L-serine) and the gly-cosph-in-golipid
 []


Underfull \hbox (badness 7064) in paragraph at lines 459--469
\T1/bch/m/n/9 Monosialote-tra-hex-o-syl-gan-glio-side (GM1) from ovine brain
 []


Underfull \hbox (badness 3861) in paragraph at lines 459--469
\T1/bch/m/n/9 Ma-treya, LLC. The dye $[][]$ (1,1'-Dioctadecyl-3,3,3',3'-
 []


Underfull \hbox (badness 1237) in paragraph at lines 459--469
\T1/bch/m/n/9 pro-vided by Prof. Ludger Jo-hannes, In-sti-tut Curie, CNRS
 []

File: head_foot/LF.pdf Graphic file (type pdf)
<use head_foot/LF.pdf>
Package pdftex.def Info: head_foot/LF.pdf  used on input line 560.
(pdftex.def)             Requested size: 167.78156pt x 9.0pt.
File: head_foot/RF.pdf Graphic file (type pdf)
<use head_foot/RF.pdf>
Package pdftex.def Info: head_foot/RF.pdf  used on input line 560.
(pdftex.def)             Requested size: 90.4577pt x 7.46786pt.
[3]
Underfull \hbox (badness 10000) in paragraph at lines 562--576

 []

Package epstopdf Info: Source file: <Figure1+2.eps>
(epstopdf)                    date: 2019-07-05 11:14:14
(epstopdf)                    size: 23847362 bytes
(epstopdf)             Output file: <Figure1+2-eps-converted-to.pdf>
(epstopdf)                    date: 2019-07-05 11:14:36
(epstopdf)                    size: 970492 bytes
(epstopdf)             Command: <epstopdf --outfile=Figure1+2-eps-converted-to.
pdf Figure1+2.eps>
(epstopdf)             \includegraphics on input line 586.
Package epstopdf Info: Output file is already uptodate.
<Figure1+2-eps-converted-to.pdf, id=229, 254.9525pt x 210.7875pt>
File: Figure1+2-eps-converted-to.pdf Graphic file (type pdf)
<use Figure1+2-eps-converted-to.pdf>
Package pdftex.def Info: Figure1+2-eps-converted-to.pdf  used on input line 586
.
(pdftex.def)             Requested size: 476.03984pt x 393.59811pt.
LaTeX Font Info:    Font shape `OT1/ptm/bx/n' in size <8> not available
(Font)              Font shape `OT1/ptm/b/n' tried instead on input line 608.
File: head_foot/RF.pdf Graphic file (type pdf)
<use head_foot/RF.pdf>
Package pdftex.def Info: head_foot/RF.pdf  used on input line 700.
(pdftex.def)             Requested size: 90.4577pt x 7.46786pt.
File: head_foot/LF.pdf Graphic file (type pdf)
<use head_foot/LF.pdf>
Package pdftex.def Info: head_foot/LF.pdf  used on input line 700.
(pdftex.def)             Requested size: 167.78156pt x 9.0pt.
[4]
File: head_foot/LF.pdf Graphic file (type pdf)
<use head_foot/LF.pdf>
Package pdftex.def Info: head_foot/LF.pdf  used on input line 700.
(pdftex.def)             Requested size: 167.78156pt x 9.0pt.
File: head_foot/RF.pdf Graphic file (type pdf)
<use head_foot/RF.pdf>
Package pdftex.def Info: head_foot/RF.pdf  used on input line 700.
(pdftex.def)             Requested size: 90.4577pt x 7.46786pt.
 [5 <./Figure1+2-eps-converted-to.pdf>]
Package epstopdf Info: Source file: <Figure3.eps>
(epstopdf)                    date: 2019-07-05 11:09:24
(epstopdf)                    size: 47339514 bytes
(epstopdf)             Output file: <Figure3-eps-converted-to.pdf>
(epstopdf)                    date: 2019-07-05 11:09:35
(epstopdf)                    size: 583804 bytes
(epstopdf)             Command: <epstopdf --outfile=Figure3-eps-converted-to.pd
f Figure3.eps>
(epstopdf)             \includegraphics on input line 801.
Package epstopdf Info: Output file is already uptodate.
<Figure3-eps-converted-to.pdf, id=284, 253.94875pt x 283.0575pt>
File: Figure3-eps-converted-to.pdf Graphic file (type pdf)
<use Figure3-eps-converted-to.pdf>
Package pdftex.def Info: Figure3-eps-converted-to.pdf  used on input line 801.
(pdftex.def)             Requested size: 476.03984pt x 530.62782pt.
Package epstopdf Info: Source file: <Figure4.eps>
(epstopdf)                    date: 2019-09-12 13:49:37
(epstopdf)                    size: 16752626 bytes
(epstopdf)             Output file: <Figure4-eps-converted-to.pdf>
(epstopdf)                    date: 2019-09-12 13:49:48
(epstopdf)                    size: 251809 bytes
(epstopdf)             Command: <epstopdf --outfile=Figure4-eps-converted-to.pd
f Figure4.eps>
(epstopdf)             \includegraphics on input line 821.
Package epstopdf Info: Output file is already uptodate.
<Figure4-eps-converted-to.pdf, id=285, 297.11pt x 138.5175pt>
File: Figure4-eps-converted-to.pdf Graphic file (type pdf)
<use Figure4-eps-converted-to.pdf>
Package pdftex.def Info: Figure4-eps-converted-to.pdf  used on input line 821.
(pdftex.def)             Requested size: 502.4883pt x 234.28032pt.
Package epstopdf Info: Source file: <Figure5.eps>
(epstopdf)                    date: 2019-09-13 09:03:10
(epstopdf)                    size: 1103422 bytes
(epstopdf)             Output file: <Figure5-eps-converted-to.pdf>
(epstopdf)                    date: 2019-09-13 09:06:09
(epstopdf)                    size: 34645 bytes
(epstopdf)             Command: <epstopdf --outfile=Figure5-eps-converted-to.pd
f Figure5.eps>
(epstopdf)             \includegraphics on input line 853.
Package epstopdf Info: Output file is already uptodate.
<Figure5-eps-converted-to.pdf, id=290, 748.7975pt x 340.27126pt>
File: Figure5-eps-converted-to.pdf Graphic file (type pdf)
<use Figure5-eps-converted-to.pdf>
Package pdftex.def Info: Figure5-eps-converted-to.pdf  used on input line 853.
(pdftex.def)             Requested size: 502.4883pt x 228.344pt.

Underfull \hbox (badness 5374) in paragraph at lines 888--907
[]\T1/bch/m/n/9 For each pro-tein sev-eral mea-sure-ments of small rolls
 []


Underfull \hbox (badness 3769) in paragraph at lines 888--907
\T1/bch/m/n/9 were car-ried out, $[][] \OT1/ztmcm/m/n/9 = 70[]$ \T1/bch/m/n/9 a
nd $[][] \OT1/ztmcm/m/n/9 =
 []

File: head_foot/RF.pdf Graphic file (type pdf)
<use head_foot/RF.pdf>
Package pdftex.def Info: head_foot/RF.pdf  used on input line 996.
(pdftex.def)             Requested size: 90.4577pt x 7.46786pt.
File: head_foot/LF.pdf Graphic file (type pdf)
<use head_foot/LF.pdf>
Package pdftex.def Info: head_foot/LF.pdf  used on input line 996.
(pdftex.def)             Requested size: 167.78156pt x 9.0pt.
[6]
File: head_foot/LF.pdf Graphic file (type pdf)
<use head_foot/LF.pdf>
Package pdftex.def Info: head_foot/LF.pdf  used on input line 996.
(pdftex.def)             Requested size: 167.78156pt x 9.0pt.
File: head_foot/RF.pdf Graphic file (type pdf)
<use head_foot/RF.pdf>
Package pdftex.def Info: head_foot/RF.pdf  used on input line 996.
(pdftex.def)             Requested size: 90.4577pt x 7.46786pt.
 [7 <./Figure3-eps-converted-to.pdf>]
File: head_foot/RF.pdf Graphic file (type pdf)
<use head_foot/RF.pdf>
Package pdftex.def Info: head_foot/RF.pdf  used on input line 996.
(pdftex.def)             Requested size: 90.4577pt x 7.46786pt.
File: head_foot/LF.pdf Graphic file (type pdf)
<use head_foot/LF.pdf>
Package pdftex.def Info: head_foot/LF.pdf  used on input line 996.
(pdftex.def)             Requested size: 167.78156pt x 9.0pt.
 [8 <./Figure4-eps-converted-to.pdf> <./Figure5-eps-converted-to.pdf>]
Underfull \hbox (badness 2111) in paragraph at lines 1013--1045
[]\T1/bch/m/n/9 The mean rolling ve-loc-i-ties ob-tained for the tox-ins are
 []


Underfull \hbox (badness 2564) in paragraph at lines 1013--1045
\OT1/ztmcm/m/n/9 0\OML/ztmcm/m/it/9 :\OT1/ztmcm/m/n/9 31 \OMS/ztmcm/m/n/9  \OT
1/ztmcm/m/n/9 10[][]$\T1/bch/m/n/9 . While for the an-nex-ins the anal-y-sis yi
eld
 []

Package epstopdf Info: Source file: <Figure6.eps>
(epstopdf)                    date: 2019-08-28 14:54:32
(epstopdf)                    size: 789982 bytes
(epstopdf)             Output file: <Figure6-eps-converted-to.pdf>
(epstopdf)                    date: 2019-08-28 14:54:46
(epstopdf)                    size: 68669 bytes
(epstopdf)             Command: <epstopdf --outfile=Figure6-eps-converted-to.pd
f Figure6.eps>
(epstopdf)             \includegraphics on input line 1068.
Package epstopdf Info: Output file is already uptodate.
<Figure6-eps-converted-to.pdf, id=383, 154.5775pt x 120.45pt>
File: Figure6-eps-converted-to.pdf Graphic file (type pdf)
<use Figure6-eps-converted-to.pdf>
Package pdftex.def Info: Figure6-eps-converted-to.pdf  used on input line 1068.

(pdftex.def)             Requested size: 502.4883pt x 391.58463pt.

LaTeX Warning: `h' float specifier changed to `ht'.

File: head_foot/LF.pdf Graphic file (type pdf)
<use head_foot/LF.pdf>
Package pdftex.def Info: head_foot/LF.pdf  used on input line 1161.
(pdftex.def)             Requested size: 167.78156pt x 9.0pt.
File: head_foot/RF.pdf Graphic file (type pdf)
<use head_foot/RF.pdf>
Package pdftex.def Info: head_foot/RF.pdf  used on input line 1161.
(pdftex.def)             Requested size: 90.4577pt x 7.46786pt.
[9]
Package epstopdf Info: Source file: <Figure7.eps>
(epstopdf)                    date: 2019-07-05 09:47:25
(epstopdf)                    size: 2704790 bytes
(epstopdf)             Output file: <Figure7-eps-converted-to.pdf>
(epstopdf)                    date: 2019-07-05 09:50:57
(epstopdf)                    size: 262267 bytes
(epstopdf)             Command: <epstopdf --outfile=Figure7-eps-converted-to.pd
f Figure7.eps>
(epstopdf)             \includegraphics on input line 1173.
Package epstopdf Info: Output file is already uptodate.
<Figure7-eps-converted-to.pdf, id=412, 776.9025pt x 626.34pt>
File: Figure7-eps-converted-to.pdf Graphic file (type pdf)
<use Figure7-eps-converted-to.pdf>
Package pdftex.def Info: Figure7-eps-converted-to.pdf  used on input line 1173.

(pdftex.def)             Requested size: 502.4883pt x 405.11871pt.

Underfull \vbox (badness 2790) has occurred while \output is active []


LaTeX Warning: `h' float specifier changed to `ht'.


Overfull \hbox (273.71552pt too wide) has occurred while \output is active
[][][] 
 []


Overfull \vbox (6.00002pt too high) has occurred while \output is active []

File: head_foot/RF.pdf Graphic file (type pdf)
<use head_foot/RF.pdf>
Package pdftex.def Info: head_foot/RF.pdf  used on input line 1268.
(pdftex.def)             Requested size: 90.4577pt x 7.46786pt.
File: head_foot/LF.pdf Graphic file (type pdf)
<use head_foot/LF.pdf>
Package pdftex.def Info: head_foot/LF.pdf  used on input line 1268.
(pdftex.def)             Requested size: 167.78156pt x 9.0pt.

[10 <./Figure6-eps-converted-to.pdf>]
Underfull \vbox (badness 10000) has occurred while \output is active []


Underfull \vbox (badness 10000) has occurred while \output is active []


Overfull \hbox (273.71552pt too wide) has occurred while \output is active
[][][] 
 []


Overfull \vbox (6.00002pt too high) has occurred while \output is active []

File: head_foot/LF.pdf Graphic file (type pdf)
<use head_foot/LF.pdf>
Package pdftex.def Info: head_foot/LF.pdf  used on input line 1303.
(pdftex.def)             Requested size: 167.78156pt x 9.0pt.
File: head_foot/RF.pdf Graphic file (type pdf)
<use head_foot/RF.pdf>
Package pdftex.def Info: head_foot/RF.pdf  used on input line 1303.
(pdftex.def)             Requested size: 90.4577pt x 7.46786pt.

[11 <./Figure7-eps-converted-to.pdf>]
Underfull \hbox (badness 10000) in paragraph at lines 1361--1367

 []


Underfull \hbox (badness 10000) in paragraph at lines 1368--1392

 []


Underfull \hbox (badness 10000) in paragraph at lines 1394--1396

 []


Underfull \hbox (badness 10000) in paragraph at lines 1398--1400

 []

(Article_Revised_Diff.bbl
Underfull \hbox (badness 10000) in paragraph at lines 1403--4

 []


Package balance Warning: You have called \balance in second column
(balance)                Columns might not be balanced.

File: head_foot/RF.pdf Graphic file (type pdf)
<use head_foot/RF.pdf>
Package pdftex.def Info: head_foot/RF.pdf  used on input line 54.
(pdftex.def)             Requested size: 90.4577pt x 7.46786pt.
File: head_foot/LF.pdf Graphic file (type pdf)
<use head_foot/LF.pdf>
Package pdftex.def Info: head_foot/LF.pdf  used on input line 54.
(pdftex.def)             Requested size: 167.78156pt x 9.0pt.
[12]
Underfull \hbox (badness 1394) in paragraph at lines 191--199
[]\T1/bch/m/n/9 T. L. Boye, J. C. Jeppe-sen, K. Maeda, W. Pezeshkian,
 []


Underfull \vbox (badness 10000) has occurred while \output is active []


Underfull \hbox (badness 6364) in paragraph at lines 379--387
[]\T1/bch/m/n/9 W. Pezeshkian, H. Gao, S. Aru-mugam, U. Becken,
 []


Underfull \vbox (badness 10000) has occurred while \output is active []

File: head_foot/LF.pdf Graphic file (type pdf)
<use head_foot/LF.pdf>
Package pdftex.def Info: head_foot/LF.pdf  used on input line 428.
(pdftex.def)             Requested size: 167.78156pt x 9.0pt.
File: head_foot/RF.pdf Graphic file (type pdf)
<use head_foot/RF.pdf>
Package pdftex.def Info: head_foot/RF.pdf  used on input line 428.
(pdftex.def)             Requested size: 90.4577pt x 7.46786pt.
 [13])

AED: lastpage setting LastPage
File: head_foot/RF.pdf Graphic file (type pdf)
<use head_foot/RF.pdf>
Package pdftex.def Info: head_foot/RF.pdf  used on input line 1417.
(pdftex.def)             Requested size: 90.4577pt x 7.46786pt.
File: head_foot/LF.pdf Graphic file (type pdf)
<use head_foot/LF.pdf>
Package pdftex.def Info: head_foot/LF.pdf  used on input line 1417.
(pdftex.def)             Requested size: 167.78156pt x 9.0pt.
[14]
Package atveryend Info: Empty hook `BeforeClearDocument' on input line 1417.
Package atveryend Info: Empty hook `AfterLastShipout' on input line 1417.
 (Article_Revised_Diff.aux)
Package atveryend Info: Executing hook `AtVeryEndDocument' on input line 1417.
Package atveryend Info: Executing hook `AtEndAfterFileList' on input line 1417.

Package rerunfilecheck Info: File `Article_Revised_Diff.out' has not changed.
(rerunfilecheck)             Checksum: D41D8CD98F00B204E9800998ECF8427E;0.
Package atveryend Info: Empty hook `AtVeryVeryEnd' on input line 1417.
 ) 
Here is how much of TeX's memory you used:
 22997 strings out of 492484
 402124 string characters out of 3130473
 558630 words of memory out of 3000000
 26887 multiletter control sequences out of 15000+200000
 641895 words of font info for 169 fonts, out of 3000000 for 9000
 1141 hyphenation exceptions out of 8191
 45i,16n,67p,1364b,625s stack positions out of 5000i,500n,10000p,200000b,50000s
{C:/Program Files/MiKTeX 2.9/fonts/enc/dvips/base/8r.enc}<C:/Users/klenow/App
Data/Roaming/MiKTeX/2.9/fonts/type1/bitstrea/charter/bchb8a.pfb><C:/Users/kleno
w/AppData/Roaming/MiKTeX/2.9/fonts/type1/bitstrea/charter/bchr8a.pfb><C:/Users/
klenow/AppData/Roaming/MiKTeX/2.9/fonts/type1/bitstrea/charter/bchri8a.pfb><C:/
Program Files/MiKTeX 2.9/fonts/type1/public/amsfonts/cm/cmex10.pfb><C:/Program 
Files/MiKTeX 2.9/fonts/type1/public/amsfonts/cm/cmmi10.pfb><C:/Program Files/Mi
KTeX 2.9/fonts/type1/public/amsfonts/cm/cmr10.pfb><C:/Program Files/MiKTeX 2.9/
fonts/type1/public/amsfonts/cm/cmsy10.pfb><C:/Program Files/MiKTeX 2.9/fonts/ty
pe1/public/amsfonts/cm/cmsy7.pfb><C:/Program Files/MiKTeX 2.9/fonts/type1/publi
c/amsfonts/latxfont/lasy6.pfb><C:/Users/klenow/AppData/Roaming/MiKTeX/2.9/fonts
/type1/urw/helvetic/uhvb8a.pfb><C:/Users/klenow/AppData/Roaming/MiKTeX/2.9/font
s/type1/urw/helvetic/uhvr8a.pfb><C:/Users/klenow/AppData/Roaming/MiKTeX/2.9/fon
ts/type1/urw/symbol/usyr.pfb><C:/Users/klenow/AppData/Roaming/MiKTeX/2.9/fonts/
type1/urw/symbol/usyr.pfb><C:/Users/klenow/AppData/Roaming/MiKTeX/2.9/fonts/typ
e1/urw/times/utmr8a.pfb><C:/Users/klenow/AppData/Roaming/MiKTeX/2.9/fonts/type1
/urw/times/utmri8a.pfb>
Output written on Article_Revised_Diff.pdf (14 pages, 3208831 bytes).
PDF statistics:
 548 PDF objects out of 1000 (max. 8388607)
 91 named destinations out of 1000 (max. 500000)
 66 words of extra memory for PDF output out of 10000 (max. 10000000)
